# Supplementary material for: Efficient transgenesis and annotated genome sequence of the regenerative flatworm model Macrostomum lignano
Source: PubMed Central journal article supplement (PMC5730564; doi:10.1038/s41467-017-02214-8), 2017-12-14
Supplement: 41467_2017_2214_MOESM1_ESM.pdf [file 41467_2017_2214_MOESM1_ESM.pdf]

**Supplementary Table 1** | Effect of microinjection treatment on egg hatching

| Treatment                       | No. treated eggs | No. survived injection (%) | No. hatched (%) |
|---------------------------------|------------------|----------------------------|-----------------|
| Transferring only               | 197              | -                          | 164 (83)        |
| Microinjection H <sub>2</sub> O | 147              | 113 (77)                   | 108 (73)        |
| Microinjection Alexa555         | 194              | 135 (70)                   | 102 (53)        |

**Supplementary Table 2** | Effect of irradiation treatment on egg survival

| Irradiation dose (Gy) | No. irradiated eggs | No. hatched eggs (%) |
|-----------------------|---------------------|----------------------|
| 10                    | 33                  | 3 (10)               |
| 5                     | 34                  | 30 (88)              |
| 2.5                   | 35                  | 33 (94)              |

**Supplementary Table 3** | Genomic libraries generated in this study

| Library   | Technology | Insert | Reads <sup>a</sup> | Bases <sup>a</sup> | Accession  |
|-----------|------------|--------|--------------------|--------------------|------------|
| ML_SHG_1  | 454        | 300    | 1,251,825          | 332,023,742        | SRX2866468 |
| ML_SHG_2  | 454        | 300    | 1,961,618          | 633,169,545        | SRX2866469 |
| ML_SHG_3  | 454        | 300    | 2,215,605          | 728,249,532        | SRX2866470 |
| ML_SHG_4  | 454        | 300    | 1,080,486          | 350,450,106        | SRX2866471 |
| ML_SHG_5  | 454        | 300    | 1,227,790          | 424,947,781        | SRX2866472 |
| ML_3KB_1  | 454        | 3 kb   | 219,785            | 43,607,257         | SRX2866473 |
| ML_3KB_2  | 454        | 3 kb   | 234,763            | 46,858,248         | SRX2866474 |
| ML_3KB_3  | 454        | 3 kb   | 1,250,995          | 259,012,232        | SRX2866475 |
| ML_8KB_1  | 454        | 8 kb   | 1,700,452          | 299,532,504        | SRX2866466 |
| ML_8KB_2  | 454        | 8 kb   | 266,899            | 34,879,000         | SRX2866467 |
| ML_20KB_1 | 454        | 20 kb  | 349,619            | 67,963,897         | SRX2866478 |
| ML_20KB_2 | 454        | 20 kb  | 332,274            | 62,235,772         | SRX2866479 |
| ML_20KB_3 | 454        | 20 kb  | 916,967            | 187,484,600        | SRX2866476 |
| ML_20KB_4 | 454        | 20 kb  | 908,502            | 185,998,230        | SRX2866477 |
| HUB1_180  | Illumina   | 130    | 447,533,260        | 44,294,490,982     | SRX2866482 |
| HUB1_300  | Illumina   | 230    | 404,286,320        | 40,385,023,072     | SRX2866483 |
| DV1-400-1 | Illumina   | 310    | 37,574,290         | 3,904,917,967      | SRX2866480 |
| DV1-400-2 | Illumina   | 340    | 22,062,242         | 2,290,449,054      | SRX2866481 |
| DV1-600-1 | Illumina   | 500    | 13,201,262         | 1,371,998,967      | SRX2866484 |

|              |          |         |             |                     |            |
|--------------|----------|---------|-------------|---------------------|------------|
| DV1-600-2    | Illumina | 500     | 13,917,788  | 1,446,369,219       | SRX2866485 |
| DV1-3kb-1    | Illumina | 2.7 kb  | 47,469,690  | 4,803,681,174       | SRX2866494 |
| HUB1-5_4kb   | Illumina | 2.7 kb  | 67,616,074  | 6,540,147,915       | SRX2866493 |
| DV1-3kb-2    | Illumina | 3.1 kb  | 137,109,462 | 13,628,485,913      | SRX2866492 |
| DV1-6kb-1    | Illumina | 5.3 kb  | 42,907,318  | 4,335,393,561       | SRX2866491 |
| HUB1-3_6kb   | Illumina | 6.3 kb  | 12,574,102  | 1,202,742,615       | SRX2866490 |
| HUB1-3_7kb   | Illumina | 6.8 kb  | 13,847,722  | 1,337,266,809       | SRX2866489 |
| DV1-9kb-1    | Illumina | 7.8 kb  | 55,306,018  | 5,621,758,481       | SRX2866488 |
| HUB1-4_10kb  | Illumina | 12.4 kb | 30,165,426  | 2,948,889,118       | SRX2866487 |
| HUB1-4_9kb   | Illumina | 13 kb   | 14,677,860  | 1,431,942,626       | SRX2866486 |
| <b>TOTAL</b> |          |         |             | <b>139 Gb, 185x</b> |            |

<sup>a</sup> After adapters and quality trimming.

#### Supplementary Table 4 | Repeats in Mlig\_3\_7 genome assembly

| Repeat group                      | % of the genome |
|-----------------------------------|-----------------|
| DNA transposons                   | 3.05            |
| non-LTR retrotransposons (LINE)   | 1.66            |
| LTR retrotransposons              | 20.69           |
| SINEs                             | 0.39            |
| Low complexity and simple repeats | 1.34            |
| Tandem repeats                    | 13.12           |
| Other repeats identified by Red   | 10.05           |
| <b>Total repeats</b>              | <b>50.30</b>    |

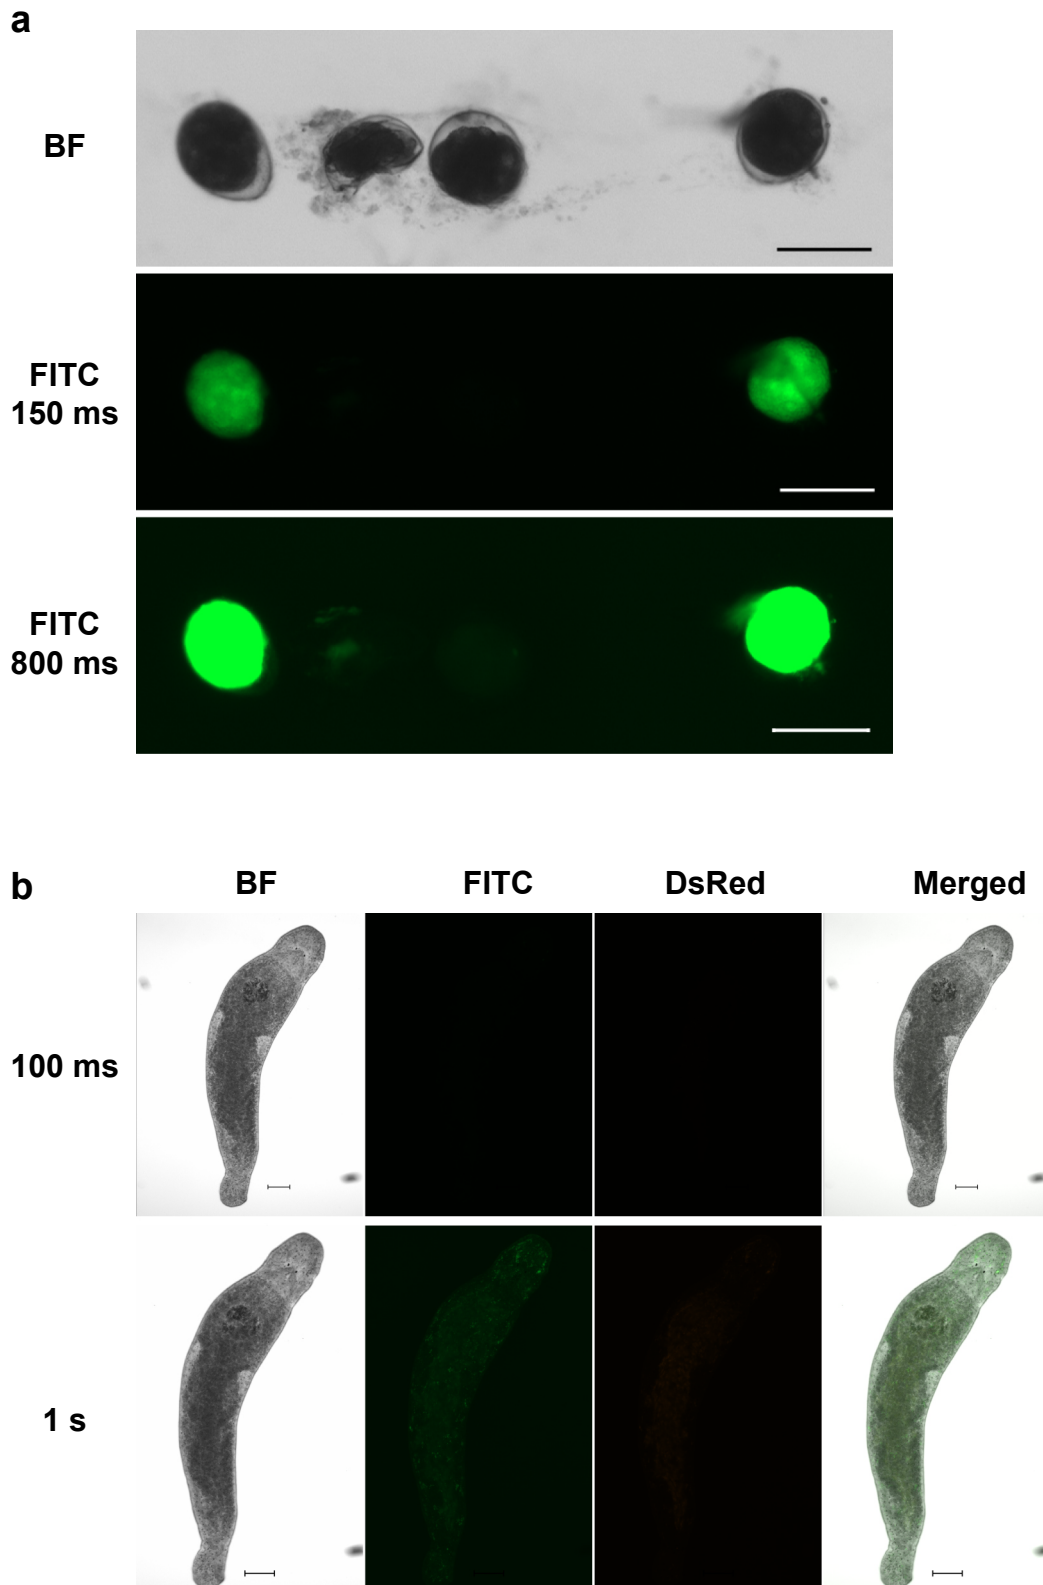

**Supplementary Figure 1** | Levels of autofluorescence in *M. lignano* embryos and adult animals. (a) Injection of *gfp* mRNA into embryos. From left to right: correctly injected embryo, embryo destroyed upon microinjection; non-injected embryo, correctly injected embryo. BF – bright-field; FITC 150 ms and FITC 800 ms – FITC channel, exposure for 100 ms and 800 ms respectively. (b). Adult non-transgenic animals, DV1 strain. BF – bright-field; FITC – FITC channel, DsRed – DsRed channel, Merged – merged image from the three channels. 100 ms and 1 s – exposure times in FITC and DsRed channels. Scale bars are 100  $\mu$ m.

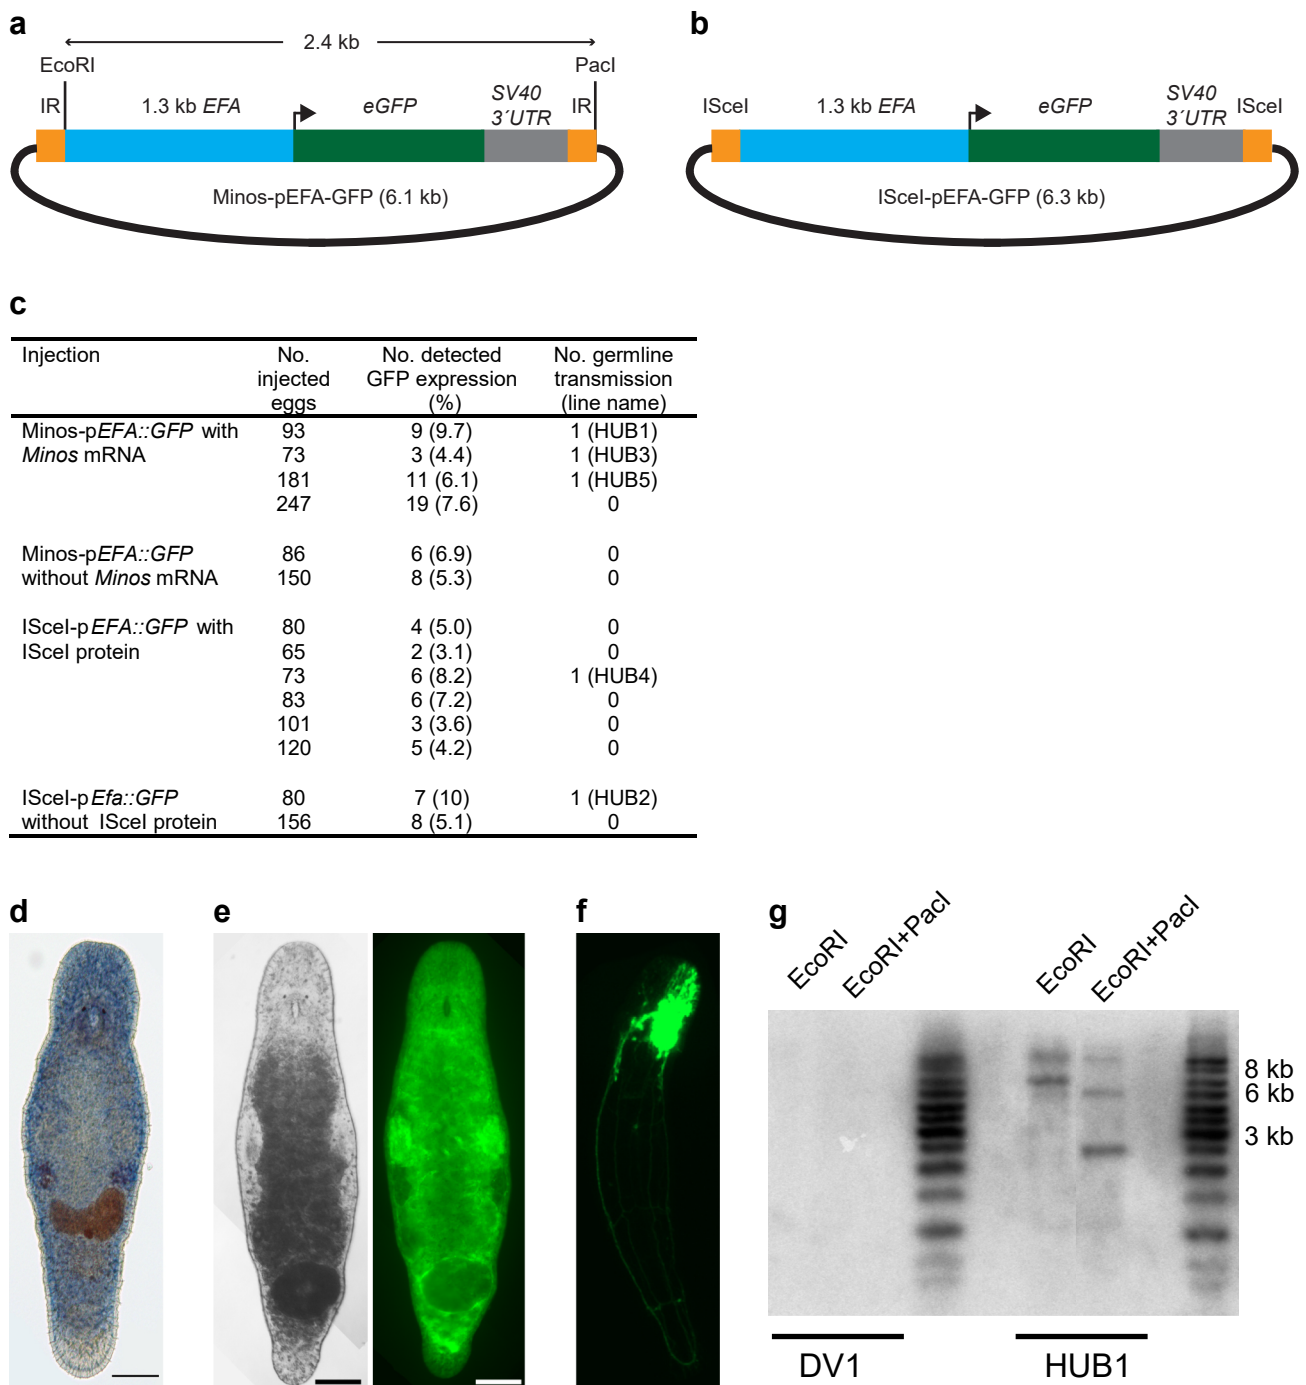

**Supplementary Figure 2** | Initial transgenesis attempts in *M. lignano* using transcriptional fusion of the Elongation factor alpha promoter sequence with *eGFP*. **(a)** *Minos* transposon-based construct. **(b)** Meganuclease *I-SceI* based construct. **(c)** Efficiency of transgenesis with different injection combinations, without irradiation. **(d)** Whole mount *in situ* hybridization expression pattern of *EFA* gene. **(e)** Stable expression in HUB1 transgenic animal, bright-field and FITC channels. **(f)** Transient expression of *pEFA::eGFP* 3 months after hatching. Note that most tissue was replaced by non-fluorescent neoblasts. Due to the low turnover of the nervous system tissue the fluorescence remained in the brain and the nerve cords. **(g)** Southern blot analysis of HUB1 line demonstrating presence of several copies of the transgene. DV1 – original wild-type line used to create HUB1.

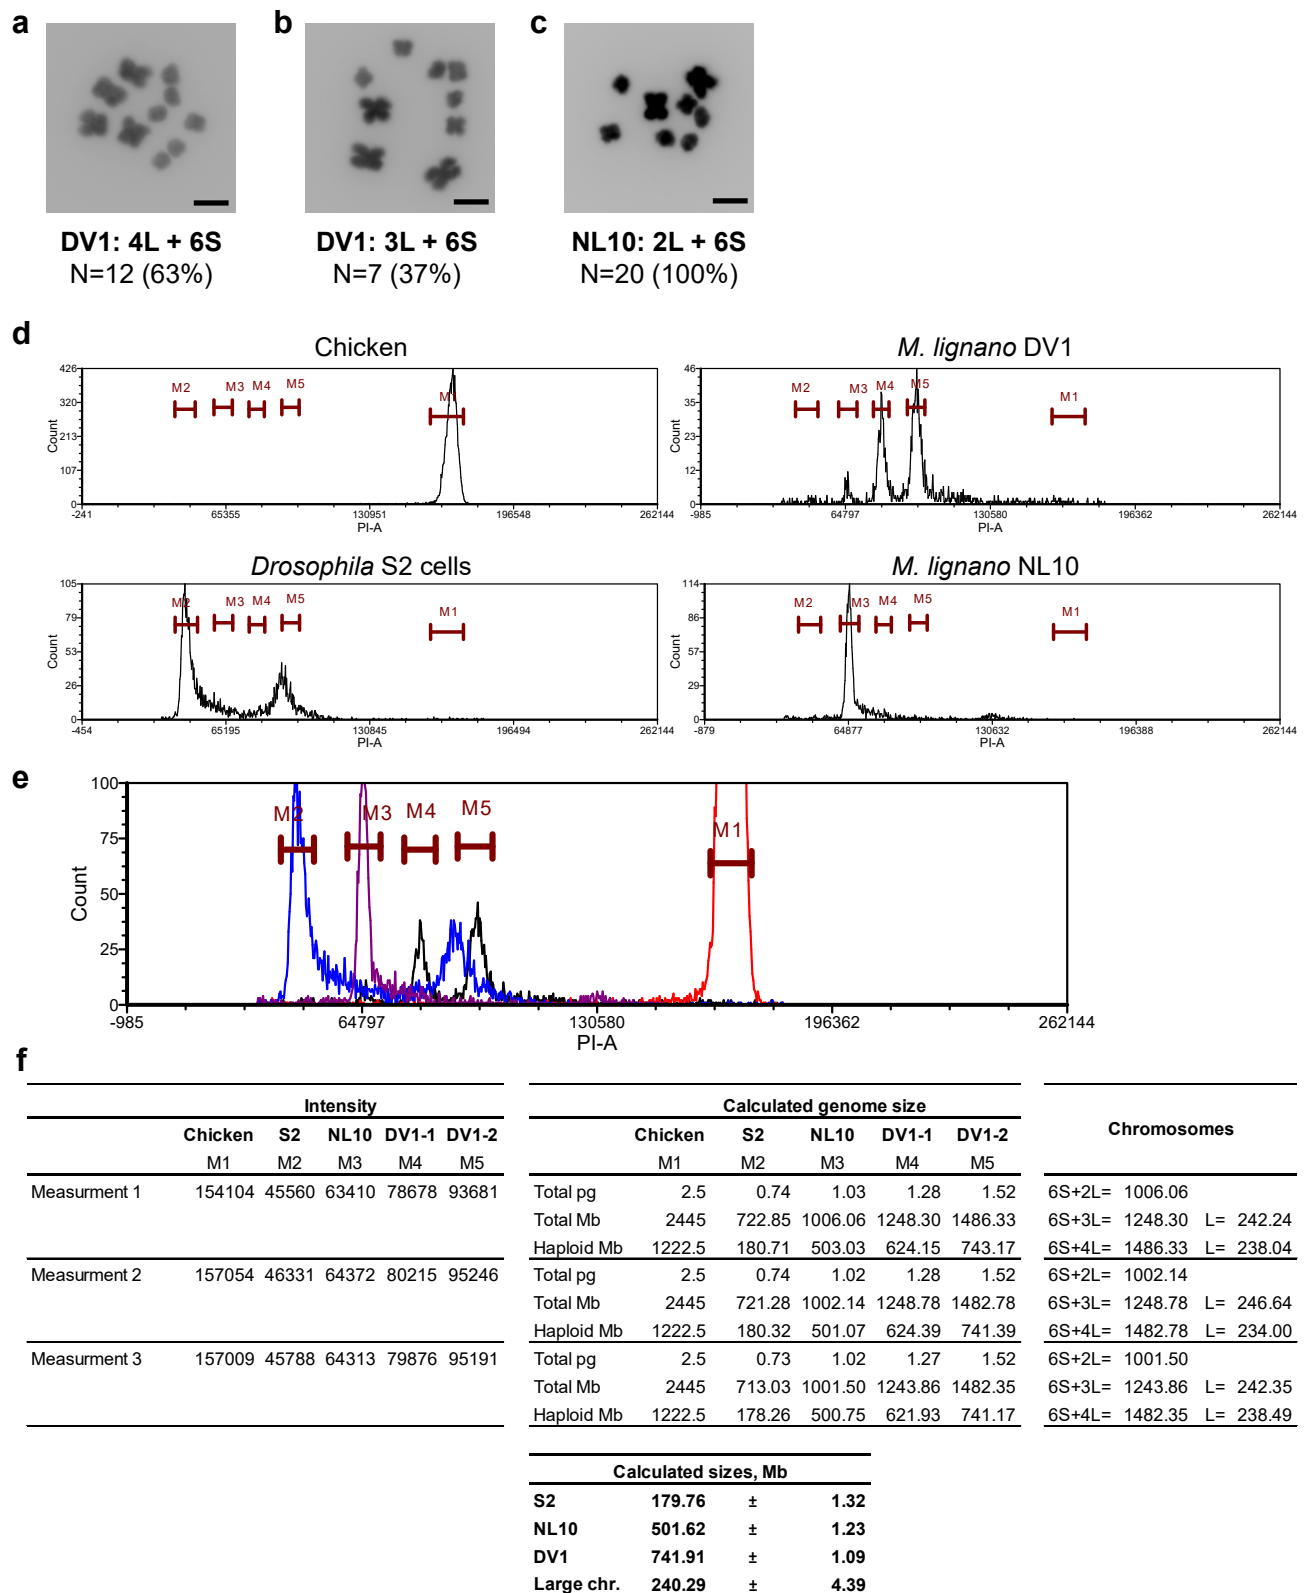

**Supplementary Figure 3** | Karyotyping and genome size measurement of the DV1 and NL10 *M. lignano* lines. (a) DV1 karyotype with 4 large chromosomes. (b) DV1 karyotype with 3 large chromosomes. (c) NL10 karyotype with 2 large chromosomes. Scale bars are 10  $\mu$ m. (d) Separate measurements of fluorescence in DV1 and NL10 lines and chicken and *Drosophila* S2 reference cells. (e) Combined fluorescence measurement of all 4 genomes. (f) Calculation of genome sizes using chicken as a reference and *Drosophila* S2 cells as a positive control. The presence of two karyotypes in the DV1 line and the karyotype difference with the NL10 line allows to estimate the size of the large chromosome. M1-M5, gates used to calculate peak intensities of different genomes in the samples.

**a**

| REAPR parameter                       | ML2           | Mlig_3_7    |
|---------------------------------------|---------------|-------------|
| Total length                          | 1,040,124,789 | 764,424,962 |
| Number of sequences                   | 49,174        | 5,270       |
| N50                                   | 36,723        | 245,921     |
| Number of gaps                        | 0             | 710         |
| Total gap length                      | 0             | 1,581,471   |
| Error free bases                      | 31.92%        | 63.95%      |
| FCD errors within a contig            | 1,871         | 872         |
| FCD errors over a gap                 | 0             | 159         |
| Low fragment coverage within a contig | 323           | 136         |
| Low fragment coverage over a gap      | 0             | 171         |

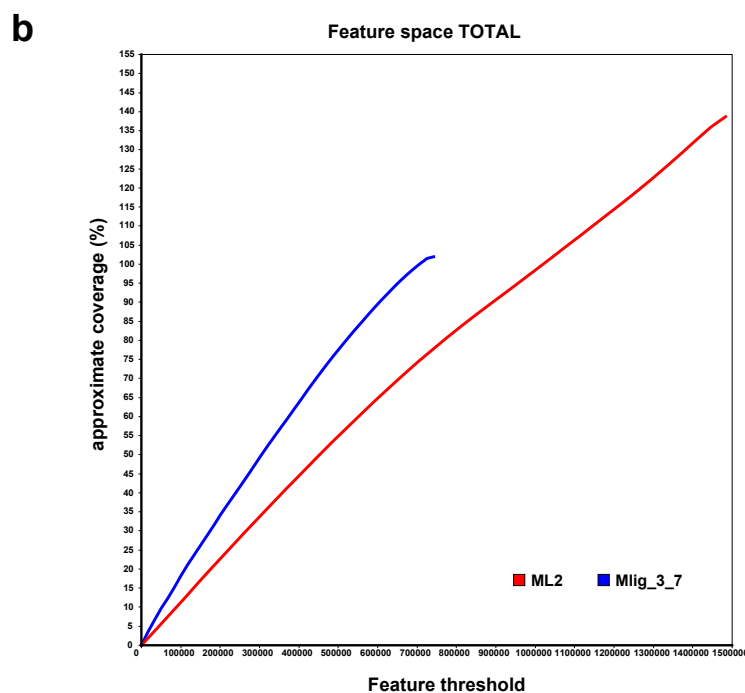

**c**

| MLRNA150904 | ML2             | Mlig_3_7        |
|-------------|-----------------|-----------------|
| non-mapped  | 3,080 (5.12%)   | 1,863 (3.10%)   |
| same ORF    | 42,290 (70.27%) | 45,033 (74.83%) |
| shorter ORF | 12,365 (20.55%) | 11,079 (18.41%) |
| longer ORF  | 2,445 (4.06%)   | 2,205 (3.66%)   |

**Supplementary Figure 4** | Comparison of the ML2 and Mlig\_3\_7 genome assemblies. (a) REAPR evaluation. The Mlig\_3\_7 assembly has more error-free bases and fewer misassemblies. (b) FRCbam evaluation on the cumulative feature count. Steeper curves reflect better assemblies. (c) Mapping of the *de novo* transcriptome assembly MLRNA150904. More transcripts are mapped to the Mlig\_3\_7 assembly and more ORFs are preserved.

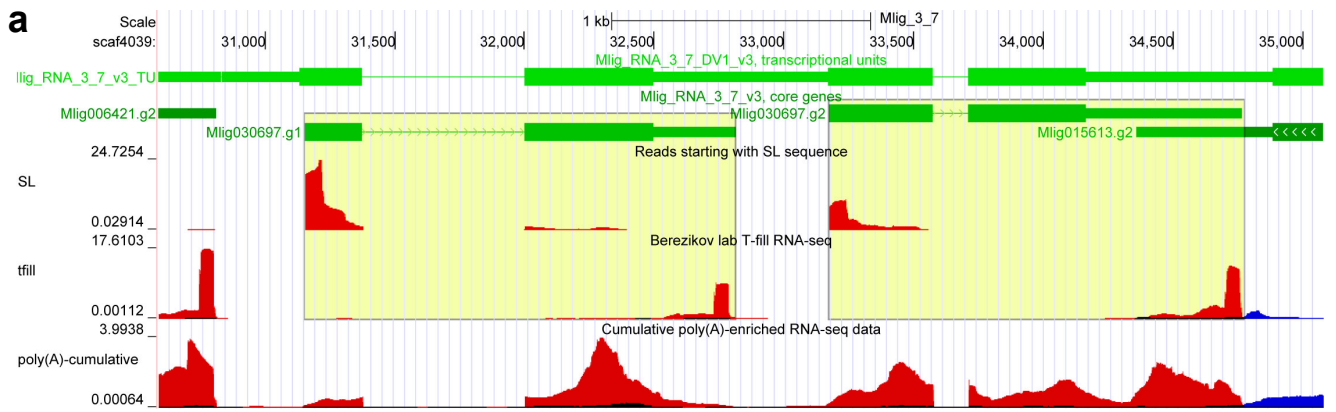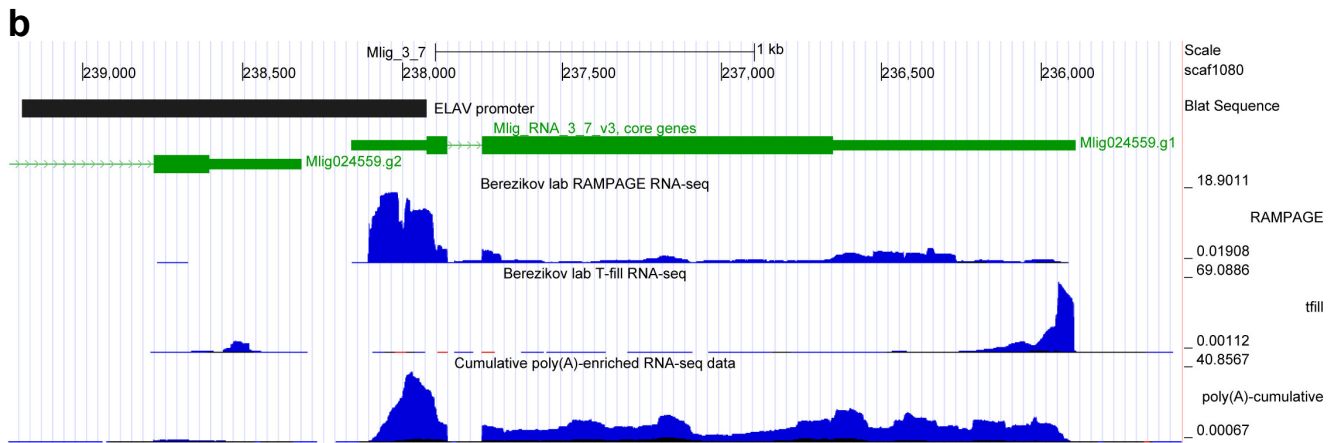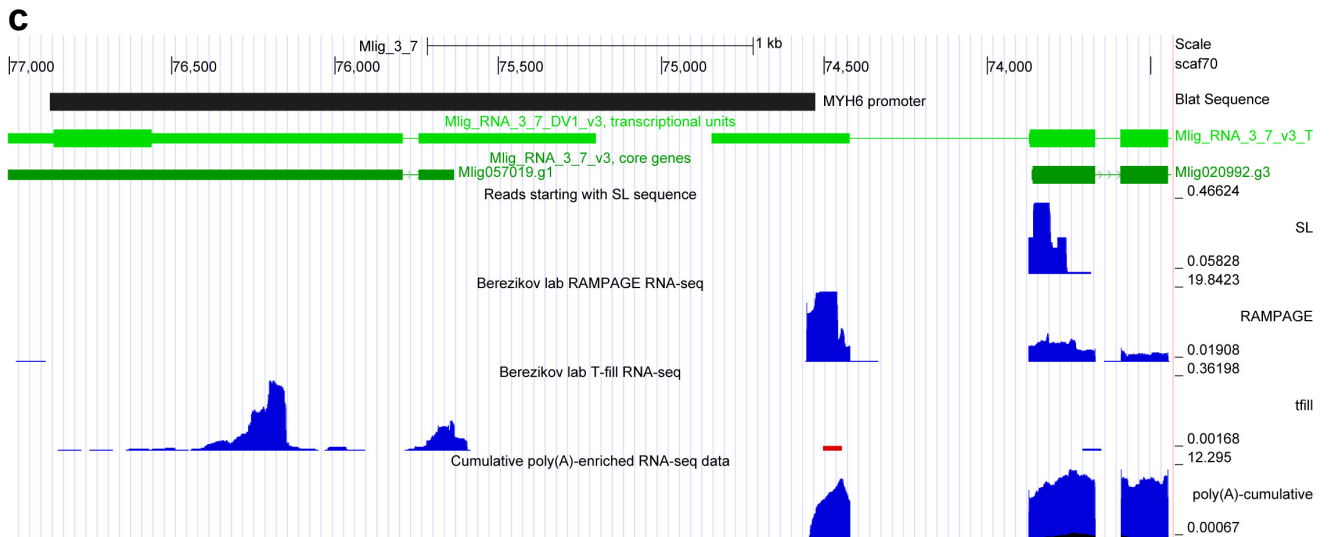

**Supplementary Figure 5** | Visualisation of *M. lignano* genomic regions using the UCSC genome browser software and selection of promoters for transgenesis. (a) An example of a transcriptional unit with multiple trans-splicing sites. Transcriptional unit Mlig030697.1 contains two trans-spliced genes, Mlig030697.g1 and Mlig030697.g2, with 5' and 3' boundaries clearly defined by trans-splicing (SL) and 3'-specific (TFILL) signals, respectively. (b) *ELAV4* gene. RAMPAGE and TFILL signals clearly define gene boundaries. (c) *MYH6* gene. RAMPAGE signal is used to define the start of the gene and promoter region is selected up to the first ATG codon.

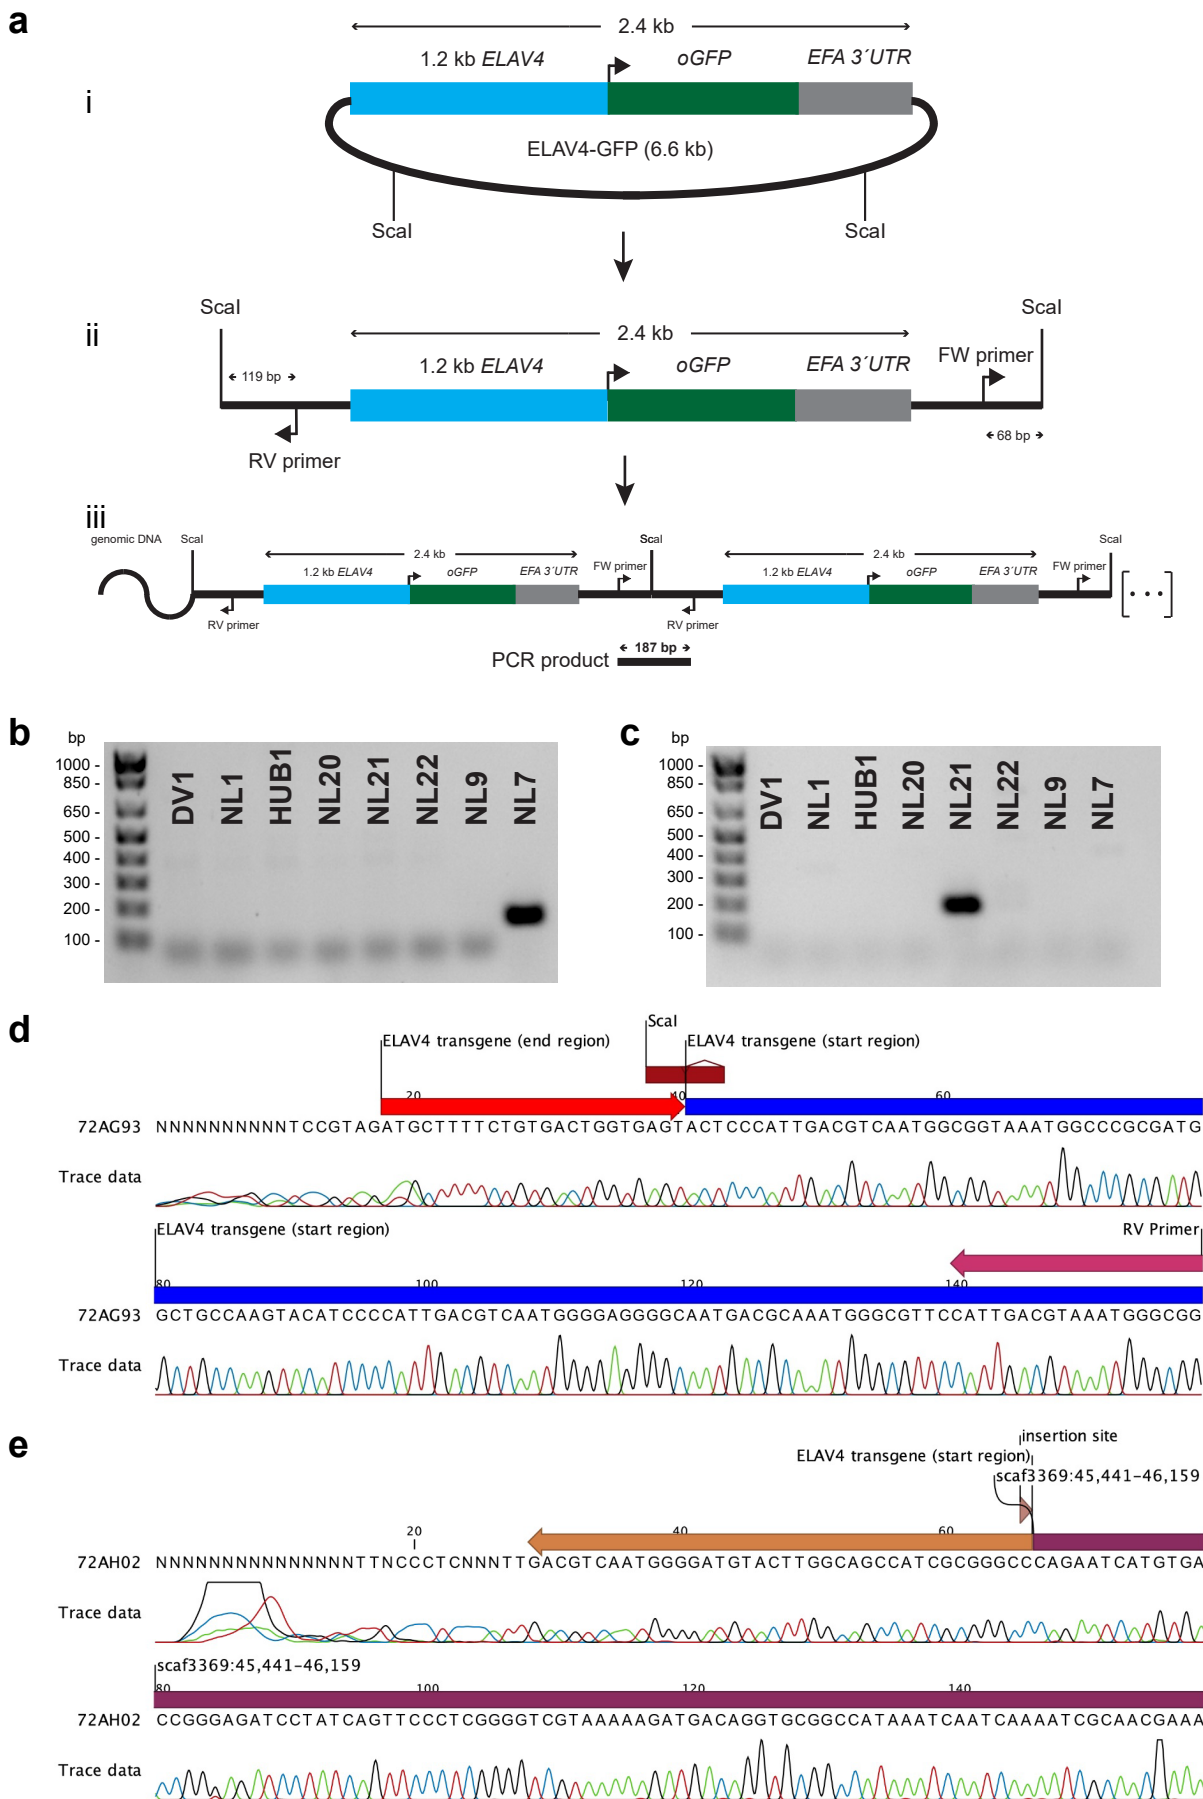

**Supplementary Figure 6 | Identification of transgene integration sites. (a)** A scheme for formation of tandem transgenes using *ELAV4::oGFP* as an example. (i) structure of the original construct; (ii) linear injected fragment; (iii) potential tandem transgene array. **(b,c)** Results of PCR from genomic DNA of different *M. lignano* lines with inverse PCR primers specific for NL7 (b) and NL21 (c) lines. In both cases PCR products of size corresponding to tandem transgene configuration are observed. **(d)** Sequencing results of the PCR product from NL21 line confirming the tandem structure of the transgene. **(e)** Sequencing results of one of the Genome Walker PCR products from NL21 line identifying integration of the transgene at position 45,440 in scaf3369.
